# Relative contributions of conformational selection and induced fit

Denis Michel

Universite de Rennes1-IRSET. Campus Santé de Villejean. 35000 Rennes France. denis.michel@live.fr

**Abstract.** A long standing debate in biochemistry is to determine if the conformational changes observed during biomolecular interactions proceed through conformational selection (of preexisting isoforms) or induced fit (ligand-induced 3D reshaping). The latter mechanism had been invoked in certain circumstances, for example to explain the non-Michaelian activity of monomeric enzymes like glucokinase. But the relative importance of induced fit has been recently depreciated in favor of conformational selection, assumed to be always sufficient, predominant in general and in particular for glucokinase. This question is reconsidered here through different approaches, in and out of equilibrium, using single molecule state probability, one way fluxes and net fluxes. In equilibrium, the conditions for a switch from conformational selection to induced fit at a given ligand concentration are explicated. Out of equilibrium, the simple inspection of the enzyme states circuit shows that conformational selection alone can not explain the nonlinear behavior of glucokinase and would give a Michaelian reaction rate. Moreover, when induced fit and conformational selection coexist and allow kinetic cooperativity, the net flux emerging in the linkage cycle is necessarily oriented in the direction of the induced fit path.

**Keywords:** Glucokinase; conformational selection; induced fit.

**Abbreviations:** CS: conformational selection; IF: induced fit.

## Introduction

It is generally accepted that macromolecular interactions are rarely rigid (lock and key) and involve conformational changes. A persisting question in this context is whether these changes result from a conformational selection (CS) or an induced fit (IF) mechanism [1, 2, 3, 4, 5, 6]. CS and IF are important phenomena which can stabilize specific folding states and underly nonlinear biochemical phenomena such as sigmoidal reactions. Sigmoidal or cooperative saturation curves are themselves essential for regulating biochemical systems and their possible multistability. Two main modes of sigmoidal saturation by a single ligand have been identified, which differ by the presence of a unique or several binding sites on the

macromolecule. Multisite cooperativity, frequently encountered for regulatory enzymes, can proceed through either conformational selection or induced fit, illustrated by the MWC [7] and KNF [8] models respectively. A general specificity of multisite cooperativity is to hold as well in equilibrium and nonequilibrium conditions, as long evidenced by the oxygenation of vertebrate hemoglobin that is not an enzyme. By contrast, single site cooperativity is more rarely observed and exists out of equilibrium only. These two modes of cooperativity have been pertinently called cooperativity through space (between the different sites at a given time point) and through time (between the successive states of the same site) [9]. The latter model, of kinetic cooperativity, has been developed for the enzyme glucokinase/ATP-D-glucose 6-phosphotransferase EC 2.7.1.2/hexokinase D, enriched in the liver and pancreas of vertebrates. Glucokinase displays a non-Michaelian reaction rate with respect to its substrate (glucose), that is not observed for its counterparts catalyzing the same reaction in other tissues. The mechanism of kinetic cooperativity has been clearly described by Rabin [10] and then supported experimentally [11, 12]. Its principle can be visualized intuitively using the scheme of Fig.1. In its basal conformation ( $E$ ), the enzyme binds the substrate with a low affinity, but once bound, the substrate induces the transconformation of the enzyme into a new form  $E^*$  that is "kinetically favourable but thermodynamically unfavourable" [10], that is to say less stable than  $E^*$  in absence of substrate, but conveniently folded for catalyzing the reaction. After release of the reaction product (oval in Fig.1), a kinetic competition begins between two events: the relaxation of the enzyme to its basal conformation and the reattachment of a new glucose. For a fixed relaxation rate, the issue of this race depend on glucose concentration. The physiological outcome of this mechanism is remarkable as its greatly contributes to the regulation of blood glucose levels. All the hexokinases catalyse the transformation of glucose into glucose 6-phosphate (G6P), but the fate of G6P depends on the organs. While it is consumed in most tissues, the liver has the capacity to temporarily store it in the form of glycogen, but only if the concentration of glucose in the blood exceeds a certain threshold.

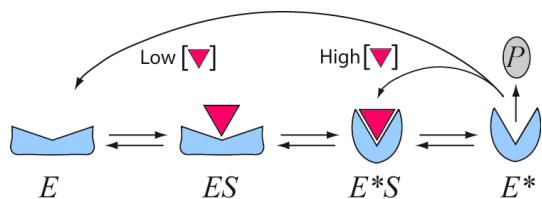

**Figure 1.** The nonlinear dependence on glucose of the glucokinase activity can be explained by a competition between relaxation of  $E^*$  into  $E$  and the direct rebinding of the substrate to  $E^*$ . At low concentration of glucose (triangles), transconformation takes place, repriming the long cycle with its inefficient initial association, whereas at higher concentration of glucose, a molecule binds immediately to the enzyme. In this short cycle, the enzyme remains in its reactive form so that the global reaction rate is speeded up.

This exquisite mechanism is based on an induced-fit mechanism. However, using the criterion of the relaxation times [3], authors revised the importance of IF and suggested that CS is in fact predominant in general [2, 5] and in particular for glucokinase [13, 3]. In the alternative approach proposed here, CS and IF are tested alone or in combination for their capacity to yield the well established non-Michaelian activity of glucokinase. On the one hand, while relaxation times are obtained from a transient return to pure IF and CS equilibrium (SI-A) [14, 3], enzymatic reaction rates are measured in driven non-equilibrium steady states. On the other hand, the predominance of CS over IF established in [2] concerns multimeric cooperativity in equilibrium (for hemoglobin) or under the quasi-equilibrium hypothesis (for enzymes like aspartate transcarbamylase [7]), but the cooperativity of monomeric enzymes like glucokinase can not be obtained in this way [15]. We will adopt the classical approximation, as old as the theory of Michaelis-Menten, that the rigid substrates are much more numerous than the macromolecules, which allows using pseudo-first order constants of association.

## Pure CS and IF enzymatic reactions

### Pure CS gives a traditional Michaelian velocity

The reaction following pure CS is

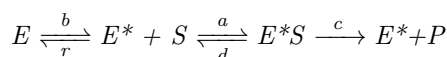

where  $b$  ( $\text{time}^{-1}$ ),  $r$  ( $\text{time}^{-1}$ ),  $a$  ( $\text{concentration}^{-1} \text{time}^{-1}$ ) and  $d$  ( $\text{time}^{-1}$ ) are the rates of bending of  $E^*$  into  $E$ , reversion to the basal conformation, association and dissociation respectively. As shown below, this scheme always gives a Michaelian reaction rate.

### Under the quasi-equilibrium approximation

The relative concentration of the different forms of the enzyme are simply linked by equilibrium constants  $Kb = b/r$  and  $Ka = a/d$ . The reaction rate is proportional to the fraction of enzyme in the form  $E^*S$  and is

$$\frac{v}{V_M} = \frac{[E^*S]}{[E]_{\text{tot}}} = \frac{KaKb[S]}{1 + Kb + KaKb[S]} \quad (1)$$

### With a nonequilibrium-steady state

When  $c$  is not negligible, the familiar hyperbolic reaction rate of Briggs and Haldane is obtained.

$$v = \frac{V_M[S]}{K_M + [S]} \quad (2a)$$

with

$$V_M = c \quad (2b)$$

and

$$K_M = \frac{(b+r)(c+d)}{ab} \quad (2c)$$

CS has been shown predominant for glucokinase [3], but we see here that it is clearly incapable alone to explain kinetic cooperativity. Let us now examine the pure induced fit mechanism.

### The pure induced fit mechanism is necessarily cyclical

At first glance, the scheme

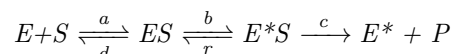

seems symmetrical to the CS scheme by permuting the conformational transition and the binding reaction; but in fact the above scheme is clearly incomplete because the enzyme should recover its basal conformation to bind a new substrate in case of pure IF. An additional backward transition is thus necessary to connect the final form  $E^*$  and the initial form  $E$ , thereby giving a cycle. Like the CS scheme, this minimal IF cycle is merely Michaelian, with new expressions for  $V_M$  and  $K_M$  (SI-B). In the pure IF scheme, the isoform  $E^*$  does not accommodate directly a new substrate molecule, but in fact there is no obvious reason that a substrate can not bind to  $E^*$  before it relaxes. This would give the full CS/IF cycle described below.

## The IF/CS dual cycle

### The IF/CS dual cycle at equilibrium

The complete cycle of enzyme state transitions is represented in Fig.2. This cycle is more realistic than pure CS or IF because even if certain enzyme states have a very low probability, they are nonetheless not forbidden.

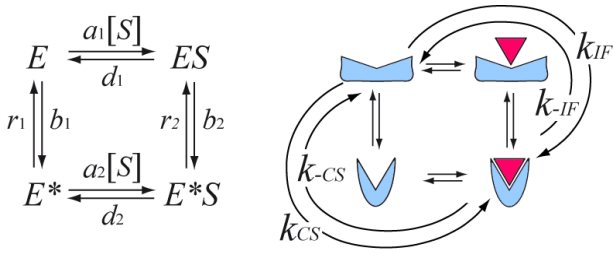

**Figure 2.** First-order binding scheme coupling CS and IF.  $k_{CS}$ ,  $k_{-CS}$ ,  $k_{IF}$  and  $k_{-IF}$  are the global rates of CS, reverse CS, IF and reverse IF respectively.

### The CS-IF switch

The relative importance of CS vs IF in equilibrium has been evaluated through different ways, including the result of relaxation experiments [3] and one-way fluxes [1]. However, this predominance may be not absolute if it can pass from one to the other mechanism depending on the conditions. Precisely, authors proposed that a higher ligand concentration could favor IF [1, 16]. Simulations further supported the possibility of a switch from CS to IF when increasing ligand concentration, provided conformational transition is slow enough [17]. Let us use here a minimal method sufficient for ranking CS and IF and determining explicitly the conditions for a switch between CS and IF. This method is based on the comparative probability that a single molecule  $E$  reaches the state  $E^*S$  via either  $E^*$  (CS, with a global rate  $k_{CS}$ ) or via  $ES$  (IF, with a global rate  $k_{IF}$ ) (Fig.2, SI-C). The global rates  $k_{CS}$  and  $k_{IF}$  are the reciprocal of the mean times of first arrival to  $E^*S$  and can be understood as "conditional rates" as follows. In the example of the CS path, the global rate is the rate that  $E$  commits first to  $E^*$  and that once at this state, it continues forward until  $E^*S$  instead of reverting back to  $E$ . The probability of this event is  $a_2[S]/(r_1 + a_2[S])$ , which gives

$$k_{CS} = b_1 \frac{a_2[S]}{r_1 + a_2[S]} \quad (3a)$$

and in the same manner

$$k_{IF} = a_1[S] \frac{b_2}{d_1 + b_2} \quad (3b)$$

$k_{CS}$  and  $k_{IF}$  are hyperbolic and linear functions of  $[S]$  respectively. Obviously these functions can intersect if the initial slope of the hyperbola ( $b_1 a_2 / r_1$ ) is higher than the slope of  $k_{IF}$ . This condition is fulfilled for  $r_1 < b_1 + d_1(a_2 b_1 / a_1 b_2)$ . In this case, there is a certain value of  $[S]$  below which  $k_{CS} > k_{IF}$  and over which  $k_{CS} < k_{IF}$ . The critical substrate concentration is

$$[S] = \frac{b_1 d_1}{a_1 b_2} + \frac{b_1}{a_2} - \frac{r_1}{a_2} \quad (4)$$

The above global rates of CS and IF for a single molecule  $E$  are always valid, but it is also interesting to consider the number of molecules to which they apply. The product of single molecule rates by the concentration of the molecules involved is called a flux. Expectedly, the one-way flux approach of [1] gives the same result (SI-D). Moreover, when defining the global rates of reverse CS ( $k_{-CS}$ ) and reverse IF ( $k_{-IF}$ ) (Fig.2), it can be easily shown (SI-E) that the forward and reverse fluxes are strictly identical

$$k_{CS}[E] = k_{-CS}[E^*S] \quad (5a)$$

and

$$k_{IF}[E] = k_{-IF}[E^*S] \quad (5b)$$

This makes it even more difficult to conclude that a path is the preferred one when the complexes formed through a path, are as rapidly dismantled through the same path.

### The CS-IF detailed balance

The generalized reversibility of forward and backward fluxes at equilibrium is known as the detailed balance and holds for any transition, as minor as it can be, in a network of any size [18]. As a consequence for the cyclic network of Fig.2, the 8 rates are mutually constrained by the detailed balance rule (SI-F) reading

$$a_1 b_2 d_2 r_1 = a_2 b_1 d_1 r_2 \quad (6a)$$

or differently written with the equilibrium constants

$$\frac{K a_1}{K a_2} = \frac{K b_1}{K b_2} \quad (6b)$$

All studies aimed at determining the relative importance of CS and IF at equilibrium (for non-enzyme macromolecules or in case of enzymes, using non-metabolizable substrates or a single substrate for a two-substrate enzyme), are plausible only if the values of the constants satisfy Eq.(6). This criterion is for example verified for the rates given for Flavodoxin in [1], but strangely not in all the models developed for glucokinase. At equilibrium, the clockwise (IF) and counterclockwise (CS) fluxes of Fig.2 cancel each other and the saturation curve is an hyperbolic function of the substrate:

$$Y = \frac{[S]}{K_d^{app} + [S]} \quad (7a)$$

with

$$K_d^{app} = \frac{1 + K b_1}{(1 + K b_2) K a_1} \quad (7b)$$

and the enzymatic reaction rate is once again Michaelian  $v = V_M[S]/(K_d^{app} + [S])$  with  $K_d^{app}$  defined above and  $V_M = c K b_2 / (1 + K b_2)$  (SI-G). We verify that the nonlinear mechanism of conformational memory does not exist in equilibrium [15].

## The mixed IF/CS cycle in non-equilibrium steady state

Equilibrium can be broken if the enzymatic rate  $c$  is not negligible compared to the rates of the cycle. In this case, a net circulation appears in the cycle, clockwise with respect to Fig.3 and whose value is

$$J_{NF} = \frac{cr_1b_2a_1[S]}{\mathfrak{D}} \quad (8a)$$

with

$$\begin{aligned} \mathfrak{D} = & (r_1 + b_1)(d_1r_2 + (d_1 + b_2)(d_2 + c)) \\ & + (r_1(r_2 + b_2) + (d_2 + c)(r_1 + b_2)) a_1[S] \\ & + (b_1(d_1 + b_2) + r_2(d_1 + b_1)) a_2[S] \\ & + (r_2 + b_2) a_1a_2[S]^2 \end{aligned} \quad (8b)$$

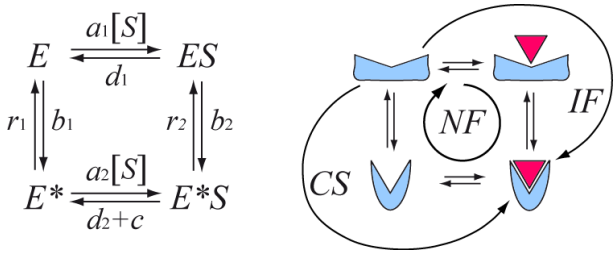

**Figure 3.** First-order scheme of enzyme state recycling, mixing CS, IF and product release (rate  $c$ ). NF: net flux arising out of equilibrium (the "turning wheel" of Wyman [20])

$J_{NF}$  is maximal at the substrate concentration cancelling the derivative of this function (SI-H). This flux holds for all the transitions, in particular for the IF transition ( $b_2[ES] - r_2[E^*S]$ ), which is strictly positive for nonzero  $c$ . In other words, the transition  $E \rightarrow ES \rightarrow E^*S$  is more frequent than  $E^*S \rightarrow ES \rightarrow E$  whereas  $E \rightarrow E^* \rightarrow E^*S$  is less frequent than  $E^*S \rightarrow E^* \rightarrow E$ . With this net flow around the cycle, non-Michaelian behaviors arise. The fraction of occupation of the enzyme by the substrate is no longer an hyperbola as previously, but becomes a nonlinear function of the substrate (SI-I). The enzymatic velocity takes the general form

$$v = \frac{A[S] + B[S]^2}{C + (A + D)[S] + B[S]^2} c[E]_{\text{tot}} \quad (9)$$

(where the constants  $A, B, \dots$  are defined in SI-J). This formula can give the expected sigmoidal rate of glucokinase for a range of parameters. To quantify this sigmoidicity, the extent of cooperativity is classically evaluated through the Hill coefficient  $n_H$  (SI-K), which cannot exceed 2 in the present case

$$n_H = 2/(1 + \sqrt{AD/BC}) \quad (10)$$

Positive cooperativity (Sigmoid) is obtained for  $n_H > 1$ , that is to say when  $BC > AD$ . Interestingly for glucokinase, a Hill coefficient of  $n_H = 1.5$  has been measured at high ATP concentrations whereas at low ATP concentrations (when  $c \approx 0$ ),  $n_H = 1$  [11], confirming the absence of nonlinearity in absence of driven flux. The net cyclical IF flux is the primary condition for obtaining kinetic cooperativity through conformational memory. To conceive the importance of its cyclical nature, note for comparison that no kinetic cooperativity is possible in the linear scheme of pure CS described previously, in which  $E^*$  had also the dual possibility to either relax or rebind a substrate molecule. The net cyclical flux should also be oriented in the direction of the IF path. As a matter of fact, the general form of velocity classically admitted for glucokinase is not obtained if we artificially force the net flux to be counterclockwise (SI-L). Hence, CS is clearly not sufficient in the present context and the positive net IF flux is necessary for kinetic cooperativity to appear, unless the accepted conclusion of conformational cooperativity is wrong for glucokinase and that its behavior results in fact from a completely different mechanism not based on conformational changes [21]. This remaining possibility is described below.

## Monomeric sigmoidicity without IF and CS

The above considerations clearly show that CS is insufficient to explain through the model of kinetic cooperativity the sigmoidal dependence on glucose of glucokinase. Hence, it is necessary to examine if alternative models can give the sigmoidal dependence on the substrate while allowing dominant CS. One such model exists, this is the random binding of two different substrates on an enzyme catalyzing bimolecular reactions. It could in principle apply to glucokinase which has two substrates: glucose and ATP. The fixation of two substrates represented in Fig.4 is theoretically sufficient to give rise to non-Michaelian rates [22] and, in particular, to sigmoidal rates [22, 23].

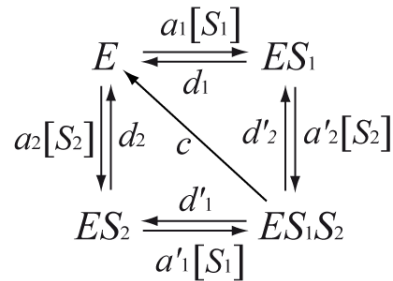

**Figure 4.** Random building of a ternary complex containing the enzyme and two different substrate molecules.

Though simple, this system is subtle enough: (i) The completely hierarchical binding of the substrates, for ex-



ample  $S_1$  always before  $S_2$ , gives a Michaelian reaction rate. (ii) A completely random filling also leads to a Michaelian behavior. (iii) But interestingly, the incomplete dominance or preference for one substrate, gives non-Michaelian curves: either sigmoidal or bell-shaped with a maximum, depending on the relative values of the constants. The conditions giving these results, the corresponding inflexion points and the apparent Hill coefficients, are detailed in [23]. For this ternary complex mechanism, conformational changes are possible but dispensable. Similar results are indeed possible with rigid binding, for example in the case of asymmetrically charged ligands [23]. This origin of cooperativity has however been ruled out for glucokinase [24], since glucose binds before ATP to glucokinase and the binding of ATP remains Michaelian for all the doses of glucose.

## Concluding remarks

CS is definitely insufficient to yield the kinetic cooperativity of glucokinase, as previously shown for other enzymes undergoing a conformational change after initial substrate binding [4]. Several simple conclusions can be drawn:

- Pure CS and IF modes of binding are unable to explain the sigmoidal dependence on glucose of glucokinase, suggesting the existence of a mixed cycle combining CS and IF.
- In the dual cycle mixing CS and IF under the rapid pre-equilibrium assumption, the relative importance of CS and IF is joined by the detailed balance to the relative affinities of the two isoforms for the substrate. In this condition, kinetic cooperativity is impossible.
- In non-equilibrium steady state, a net cyclical flow appears, corresponding to the IF path, opposite to the CS path and allowing kinetic cooperativity.

The claim that CS is always sufficient seems to not apply to kinetic cooperativity, which primarily relies upon IF. This crucial role of IF does not exclude the existence of pre-equilibria between many enzyme isoforms. Dynamic disorder is a generalized property of protein folding and the present report is not aimed at minimizing the widespread existence of CS. The categories of enzymes states defined here ( $E$ ,  $E^*$ ,  $ES$ ,  $E^*S$ ) can be viewed as representative of many sub-isoforms without altering the results. For example, fluctuating Michaelian enzymes still display globally Michaelian behaviors as long as the topology of the network and the associated net fluxes are maintained [25]. In the enzymatic reaction studied here involving the joined CS/IF scheme, the driver transition breaking equilibrium is the rate  $c$ . It has been considered completely irreversible for simplicity,

but a reversible transition unbalanced enough to break equilibrium would have been sufficient. The one-way arrow commonly used in enzymology without corruption of the results, is not elementary since it covers at least two more elementary transitions: the transformation of substrate(s) into product(s) and the subsequent release of the product(s). Contrary to a common misconception, the micro-irreversibility of the enzymatic reaction is not due to the fact that enzymes work in a one-way manner, but simply reflects the open nature of cellular systems. Indeed, a reaction is evolutionary selected when its product is useful for subsequent reactions or syntheses. As a consequence, the stationary concentration of the product is very low in the cell, thus preventing its reuptake. This pumping must of course be compensated by a permanent replenishment in substrate. This situation is mimicked in vitro when measuring initial velocities, as the concentration of products in the mixture is still negligible. In the context of the present report, the micro-irreversibility of  $c$  has two essential virtues: (i) it breaks the cyclic detailed balance rule and (ii) it directs the net flow. The topology of the steady state scheme of Fig.3 and its net IF flux, illustrate well the organizational potential of non-equilibrium mechanisms [26] and the sentence of Prigogine "Nature begins to see out of equilibrium". In the present example, a single molecule of glucokinase, without the need for regulating its synthesis or of other biochemical circuits, can act as (i) a sensor of glucose concentration, (ii) an enzyme with a conditional activity and (iii) a regulator of glucose concentration in the blood, working in a real time manner but not by corrective feedback. For monomeric enzymes, this refined behavior necessitates a non-equilibrium mechanism, that is to say a net flux reflecting a difference of free energy between the different forms of the enzyme. This difference is itself directly related to the asymmetry between forward and backward fluxes [27].

$$G(E^*S) - G(E) = -RT \ln(J_{IF}/J_{-IF}) \quad (11)$$

It may seem surprising that similar behaviors are obtained in equilibrium for multimeric enzymes [26]. Multimerization can be viewed as an optimized recipe in which the classical thermodynamic cost has been replaced by a structural information which had itself a past evolutionary cost [28]

## References

- [1] Hammes GG, Chang YC, Oas TG (2009) Conformational selection or induced fit: a flux description of reaction mechanism. *Proc Natl Acad Sci USA* 106, 13737-13741.
- [2] Changeux J-P, Edelstein S (2011) Conformational selection or induced fit? 50 years of debate resolved. *F1000 Biol Rep* 3,19.

- [3] Vogt AD, Di Cera E (2012) Conformational selection or induced fit? A critical appraisal of the kinetic mechanism. *Biochemistry* 51, 5894-5902.
- [4] Sullivan SM, Holyoak T (2008.) Enzymes with lid-gated active sites must operate by an induced fit mechanism instead of conformational selection. *Proc Natl Acad Sci USA* 105, 13829-13834.
- [5] Vogt AD, Di Cera E (2013) Conformational selection is a dominant mechanism of ligand binding. *Biochemistry* 52, 5723-5729.
- [6] Vogt AD, Pozzi N, Chen Z, Di Cera E (2014) Essential role of conformational selection in ligand binding. *Biophys Chem* 186, 13-21.
- [7] Monod J, Wyman J, Changeux JP (1965.) On the nature of allosteric transitions: A plausible model. *J Mol Biol* 12, 88-118.
- [8] Koshland DE Jr, Nmethy G, Filmer D (1966) Comparison of experimental binding data and theoretical models in proteins containing subunits. *Biochemistry* 5, 365-585.
- [9] Whitehead E (1970) The regulation of enzyme activity and allosteric transition. *Prog Biophys Mol Biol* 21, 321-397.
- [10] Rabin BR (1967) Co-operative effects in enzyme catalysis: a possible kinetic model based on substrate-induced conformation isomerization. *Biochem J* 102, 22C-23C.
- [11] Storer AC, Cornish-Bowden A (1976) Kinetics of rat liver glucokinase. Co-operative interactions with glucose at physiologically significant concentrations. *Biochem J* 159, 7-14.
- [12] Storer AC, Cornish-Bowden A (1977) Kinetic evidence for a 'mnemonic' mechanism for rat liver glucokinase. *Biochem J* 165, 61-69.
- [13] Kim YB, Kalinowski SS, Marcinkeviciene J (2007) A pre-steady state analysis of ligand binding to human glucokinase: evidence for a preexisting equilibrium. *Biochemistry* 46, 1423-1431.
- [14] Hammes GG, Wu CW (1974) Kinetics of allosteric enzymes. *Annu Rev Biophys Bioeng* 3, 1-33.
- [15] Ricard J, Meunier JC, Buc J. 1974. Regulatory behavior of monomeric enzymes. 1. The mnemonic enzyme concept. *Eur J Biochem* 49, 195-208.
- [16] Daniels KG, Tonthat NK, McClure DR, Chang YC, Liu X, Schumacher MA, Fierke CA, Schmidler SC, Oas TG (2014) Ligand concentration regulates the pathways of coupled protein folding and binding. *J Am Chem Soc* 136, 822-825.
- [17] Greives N, Zhou HX (2014) Both protein dynamics and ligand concentration can shift the binding mechanism between conformational selection and induced fit. *Proc Natl Acad Sci USA* 111, 10197-10202.
- [18] Lewis GN (1925) A New Principle of Equilibrium. *Proc Natl Acad Sci USA* 11, 179-183.
- [19] Larion M, Miller BG (2012) Homotropic allosteric regulation in monomeric mammalian glucokinase. *Arch Biochem Biophys* 519, 103-111.
- [20] Wyman J (1975) The turning wheel: a study in steady states. *Proc Natl Acad Sci USA* 72,3983-3987.
- [21] Pettersson G (1986) Mechanistic origin of the sigmoidal rate behaviour of glucokinase. *Biochem J* 233, 347-350.
- [22] Dalziel K (1958) The determination of constants in a general coenzyme reaction mechanism by initial rate measurements in the steady state. *Trans Faraday Soc* 54, 1247-1253.
- [23] Ferdinand W (1966) The interpretation of non-hyperbolic rate curves for two-substrate enzymes. A possible mechanism for phosphofructokinase. *Biochem J* 98, 278-283.
- [24] Cornish-Bowden A, Storer AC (1986) Mechanistic origin of the sigmoidal rate behaviour of rat liver hexokinase D ('glucokinase'). *Biochem J* 240, 293-296.
- [25] Min W, Gopich IV, English BP, Kou SC, Xie XS, Szabo A. 2006. When does the Michaelis-Menten equation hold for fluctuating enzymes? *J Phys Chem B* 110, 20093-20097.
- [26] Michel D (2011) Basic statistical recipes for the emergence of biochemical discernment. *Prog Biophys Mol Biol* 106, 498-516.
- [27] Beard DA, Qian H (2007) Relationship between thermodynamic driving force and one-way fluxes in reversible processes. *PLoS One* 2, e144.
- [28] Michel, D (2013.) Life is a self-organizing machine driven by the informational cycle of Brillouin. *Orig Life Evol Biosph* 43, 137-150.

# Supplemental Information

## A Relaxation times

IF can be differentiated from CS through the mean times of equilibrium restoration following perturbation by changing substrate concentration. When assuming slow conformational changes and rapid ligand turnovers, as the ligand concentration increases, the relaxation time increases in IF and decreases in CS [14]. Relaxation times have been used as a diagnostic to appraise the relative contributions of CS and IF and led authors to conclude for instance that CS is predominant for glucokinase previously thought to obey IF [3]. The interpretation of relaxation times is however more delicate in absence of the poorly justified time scale separation between the transconformation and binding phenomena [6].

## B The pure IF enzymatic reaction

If after product release,  $E^*$  cannot bind directly a new substrate and can only relax into  $E$  (with a rate written  $r^*$ ), the enzymatic velocity would be purely Michaelian, with

$$V_M = \frac{cbr^*}{bc + (b + c + r)r^*} \quad (12a)$$

and

$$K_M = \frac{(bc + cd + dr)r^*}{a(bc + (b + c + r)r^*)} \quad (12b)$$

## C Comparative contribution of CS and IF predicted by single molecule probability

The probability for a single molecule  $E$  to reach the state  $E^*S$  through CS (via  $E^*$ ) rather than through IF (via  $ES$ ) is

$$P(CS) = 1 - P(IF) = \frac{k_{CS}}{k_{CS} + k_{IF}} \quad (13)$$

where  $k_{CS}$  and  $k_{IF}$  are the rates of first arrival to  $E^*S$  through CS and IF defined in C. This probability is 1/2 and the system switches from predominant CS to predominant IF when the relaxation rate is low enough such that

$$r_1 < b_1 + d_1 \frac{a_2 b_1}{a_1 b_2} \quad (14)$$

for

$$[S] = \frac{b_1 d_1}{a_1 b_2} + \frac{b_1}{a_2} - \frac{r_1}{a_2} \quad (15)$$

The same result can be obtained using the criterion of one-way fluxes described in [1].

## D One-way fluxes

The one-way fluxes passing through the CS and IF specific branches of Fig.2 are

$$J_{CS} = \left( \frac{1}{b_1[E]} + \frac{1}{a_2[E^*][S]} \right)^{-1} = \frac{b_1 a_2 [E][S]}{r_1 + a_2 [S]} \quad (16)$$

and

$$J_{IF} = \left( \frac{1}{a_1[E][S]} + \frac{1}{b_2[ES]} \right)^{-1} = \frac{a_1 b_2 [E][S]}{d_1 + b_2} \quad (17)$$

Solving  $J_{CS} = J_{IF}$  gives the same critical value of  $[S]$  as the single molecule probability approach.

## E Identity of forward and backward CS and IF fluxes in equilibrium

On the one hand, the global path rates are

- $k_{CS} = b_1 a_2 [S] / (r_1 + a_2 [S])$
- $k_{-CS} = d_2 r_1 / (r_1 + a_2 [S])$
- $k_{IF} = b_2 a_1 [S] / (d_1 + b_2)$
- $k_{-IF} = d_1 r_2 / (d_1 + b_2)$

and on the other hand, the relative concentrations of the different forms of the enzyme are related through equilibrium constants in equilibrium, as for example  $[E^*S] = \frac{b_1}{r_1} \frac{a_2}{d_2} [E][S]$ . Coupling these relationships to the global rates implies the identity of the forward and backward fluxes after simplification, such as

$$k_{-CS}[E^*S] = \frac{a_2 b_1 [E][S]}{r_1 + a_2 [S]} = k_{CS}[E]$$

## F The cyclic equilibrium rule

When the enzyme-substrate mixture is in equilibrium, the detailed balance rule (Eq.(6)) directly ensues from the product of the rate ratios which are related to the energies of each species, such as  $b_1/r_1 = e^{[\varepsilon(E) - \varepsilon(E^*)]}$ . Hence, the circular product of these ratios is

$$\frac{b_1}{r_1} \frac{a_2}{d_2} \frac{r_2}{b_2} \frac{d_1}{a_1} = e^{[\varepsilon(E) - \varepsilon(E^*)] + [\varepsilon(E^*) - \varepsilon(E^*S)] + [\varepsilon(E^*S) - \varepsilon(ES)] + [\varepsilon(ES) - \varepsilon(E)]} = e^0 = 1$$

[26]. An equivalent and even simpler way is to express the equilibrium constants, at equilibrium, as concentration ratios. It is then sufficient, after simplification, to observe the result of the product of the constants expressed in this form.

$$K a_1 = \frac{[ES]}{[E][S]}, K b_2 = \frac{[E^*S]}{[ES]}, K a_2 = \frac{[E^*S]}{[E^*][S]}, K b_1 = \frac{[E^*]}{[E]}$$

so that

$$K a_1 K b_2 = K a_2 K b_1 = \frac{[E^*S]}{[E][S]}$$

## G Enzymatic reaction rate in quasi-equilibrium

The enzymatic reaction rate proportional to the probability for a single enzyme to be in state  $E^*S$

$$v = cP(E^*S) \quad (18)$$

and

$$P(E^*S) = \frac{[E^*S]}{[E] + [E^*] + [ES] + [E^*S]} \quad (19)$$

where each concentration can be expressed as a function of  $[E]$  through equilibrium constants as shown above, so that the fraction can finally be simplified by eliminating  $[E]$  and give the Briggs-Haldane velocity, with  $V_M$  and  $K_M$  indicated in the main text.

## H Substrate concentration giving the maximal net flux

$J_{NF}$  has the general form

$$J_{NF} = \frac{\alpha[S]}{\beta + \gamma[S] + \delta[S]^2} \quad (20a)$$



where the constants are obtainable from Eq.(8). It is maximal when

$$[S] = \sqrt{\beta/\delta} \quad (20b)$$

giving the flux

$$J_{NF} = \frac{\alpha}{\gamma + 2\sqrt{\beta\delta}} \quad (20c)$$

## I Enzyme occupancy by the substrate in steady state

$$Y = P(ES) + P(E^*S) = \frac{A[S] + B[S]^2}{C + (A + D)[S] + B[S]^2} \quad (21)$$

where  $A$ ,  $B$ ,  $C$ ,  $D$  are the following constants:

- $A = a_1 r_1 (b_2 + r_2 + d_2 + c) + a_2 b_1 (b_2 + r_2 + d_1)$
- $B = a_1 a_2 (b_2 + r_2)$
- $C = (b_1 + r_1)(d_1 r_2 + (b_2 + d_1)(d_2 + c))$
- $D = a_1 b_2 (d_2 + c) + a_2 d_1 r_2$

## J General velocity formula

The general velocity formula corresponding to the enzymatic reaction of Fig.3 is

$$v = c[E]_{\text{tot}} P(E^*S) = \frac{A[S] + B[S]^2}{C + (A + D)[S] + B[S]^2} c[E]_{\text{tot}} \quad (22)$$

with

- $A = a_1 b_2 r_1 + a_2 b_1 (d_1 + b_2)$
- $B = a_1 a_2 b_2$
- $C = (b_1 + r_1)(d_1 r_2 + (d_1 + b_2)(d_2 + c))$
- $D = a_1 (r_1 r_2 + (b_2 + r_1)(d_2 + c)) + a_2 r_2 (b_1 + d_1)$

## K Hill coefficient

The Hill coefficient is the extreme slope (minimal or maximal) of the so-called Hill plot drawn in Logit coordinates. Starting from

$$\frac{v}{V_M} = \frac{A[S] + B[S]^2}{C + (A + D)[S] + B[S]^2} \quad (23a)$$

$$\frac{v}{V_M - v} = \frac{A[S] + B[S]^2}{C + D[S]} \quad (23b)$$

the Hill function  $H = \ln(v/(V_M - v))$  can be examined directly in Logit coordinates. If writing  $x = \ln[S]$ , its first and second derivatives are

$$H'(x) = 1 - \frac{A}{A + B e^x} + \frac{C}{C + D e^x} \quad (23c)$$

$$H''(x) = \frac{A}{A + B e^x} - \frac{A^2}{(A + B e^x)^2} - \frac{C}{C + D e^x} + \frac{C^2}{(C + D e^x)^2} \quad (23d)$$

The substrate concentration giving the extreme slope is obtained by solving  $H''(x) = 0$

$$[S] = \sqrt{\frac{AC}{BD}} \quad (24)$$

giving, when reintroduced into  $H'$ , a Hill coefficient of

$$n_H = \frac{2}{1 + \sqrt{\frac{AD}{BC}}} \quad (25)$$

$n_H$  has a maximum value of 2 and is higher than 1 (sigmoidal dependance on substrate) for constant values such that  $BC > AD$ .

## L Comparative results of IF and CS net fluxes on enzymatic velocity

The net flux arising in the mechanism of kinetic cooperativity is clockwise with respect to Fig.3. Let us push the asymmetry of the flow to its maximum. To this end,  $E^*$  is supposed to be a high energy species which rarely appears spontaneously from  $E$  ( $b_1 = 0$ ), but is induced by the substrate. In turn,  $E^*S$  rarely reverses to  $ES$  owing to the stabilizing effect of the substrate ( $r_2 = 0$ ). In the same way, the tightly bound substrate rarely leaves the complex  $E^*S$  unless it is converted into a product of different shape/charge ( $d_2 = 0$ ). The absence of spontaneous substrate dissociation is logical when the binding site closes after wrapping around the substrate. In these simplified but acceptable conditions, the reaction rate reads

$$\frac{v}{[E]_{\text{tot}}} = \frac{ca_1b_2(r_1[S] + a_2[S]^2)}{cr_1(d_1 + b_2) + (b_2c + b_2r_1 + cr_1)a_1[S] + b_2a_1a_2[S]^2} \quad (26)$$

which can be fitted to the observed sigmoidal glucose concentration-dependent rate of glucokinase. For comparison, if we artificially force the net flux to be clockwise, in the orientation of the CS path, by cancelling  $r_1$  and  $b_2$ , we would obtain a bell-shaped velocity curve vanishing for high substrate concentration, in contradiction with all the observations.

$$\frac{v}{[E]_{\text{tot}}} = \frac{cd_1b_1a_2[S]}{d_1b_1(r_2 + c) + (d_1r_2 + b_1r_2 + d_1b_1)a_2[S] + r_2a_1a_2[S]^2} \quad (27)$$
